# Supplementary material for: Lactose utilisation to furan carboxylates: a unique source for platform molecules
Source: Royal Society of Chemistry journal article supplement (doi:10.1039/d3gc04317g), 2023-12-20
Supplement: d3gc04317g1.pdf [file d3gc04317g1.pdf]

## Supplementary Information

### *Lactose Utilisation to Furan Carboxylates: A Novel Waste Source for Platform Molecules*

Joseph Install<sup>a</sup>, Anže Zupanc<sup>a</sup>, Mikko Nikunen<sup>b</sup>, Janne Jänis<sup>b</sup> Timo Repo<sup>\*a</sup>

**a)** Department of Chemistry, University of Helsinki, A. I. Virtasen aukio 1, P.O. Box 55, 00014 Helsinki (Finland), E-mail: [timo.repo@helsinki.fi](mailto:timo.repo@helsinki.fi).

**b)** Department of Chemistry, University of Eastern Finland, P.O. Box 111, FI-80101 Joensuu, Finland

\*Corresponding author: [timo.repo@helsinki.fi](mailto:timo.repo@helsinki.fi)

## 1.0 Oxidation of Lactose to Mucate Esters

### 1.1 Nitric acid oxidation procedure

In a round-bottom flask 5g (14mmol) of lactose monohydrate is dissolved in 40mL of 35% HNO<sub>3</sub> with 5 mol% Fe(NO<sub>3</sub>)<sub>3</sub> added, the solution was stirred (600rpm) and heated to 80°C for 24 hours. The resulting precipitate solution is diluted with deionised H<sub>2</sub>O to a total volume of 100mL. The solution is then filtered under vacuo to obtain a white solid, mucic acid which is washed with water and ethyl acetate before it is dried in an oven overnight to remove moisture, then weighed and confirmed by <sup>1</sup>H & <sup>13</sup>C NMR spectroscopy. (2.28g yield 74.9%, conversion 100%)

All NMR spectra were recorded in CDCl<sub>3</sub> or DMSO dependant on solubility with a Bruker Varance 400 instrument (at 400 MHz) using Me<sub>4</sub>Si as an internal standard. Chemical shifts are reported in ppm (δ) relative to CDCl<sub>3</sub> solvent residual peak for <sup>1</sup>H NMR (δ = 7.26 ppm) and solvent central line for <sup>13</sup>C NMR (δ = 77.16 ppm).

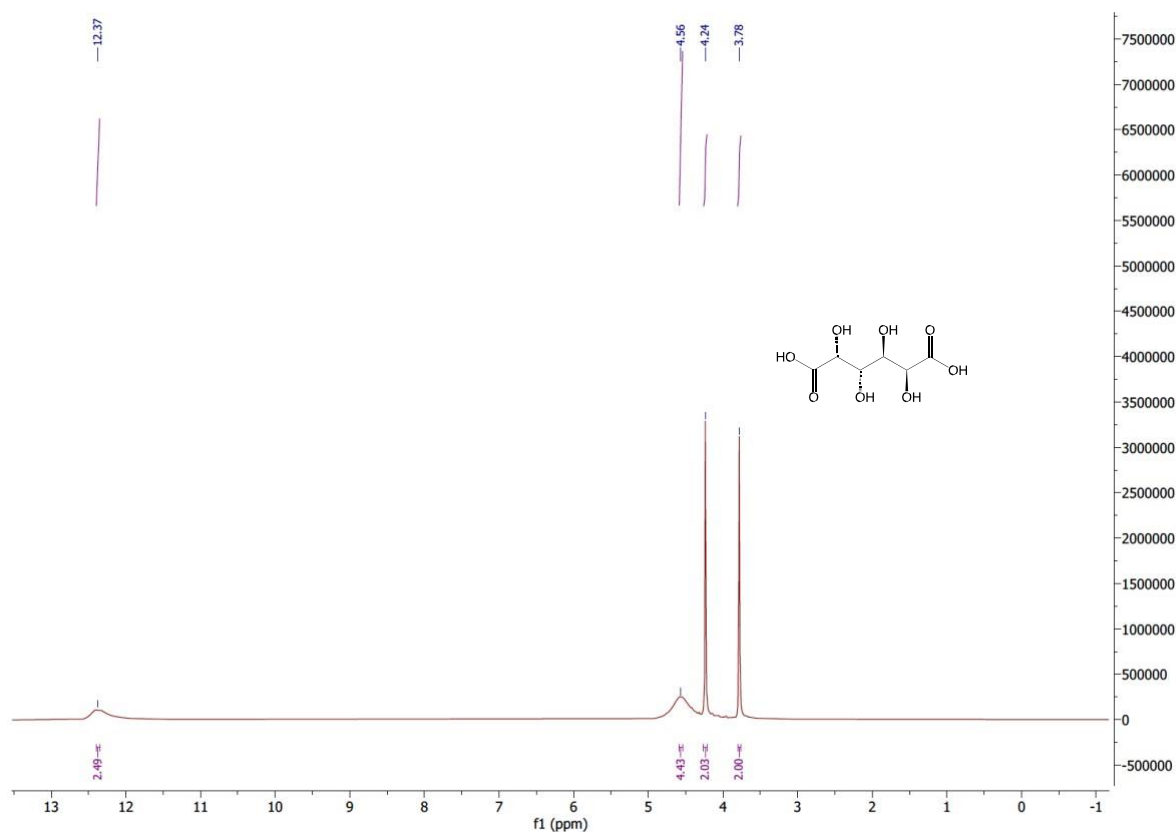

**Figure S11:** <sup>1</sup>H NMR spectrum of mucic acid from oxidation of lactose: <sup>1</sup>H NMR (400 MHz, DMSO) δ 12.37 (s, 2H), 4.56 (s, 4H), 4.24 (s, 2H), 3.78 (s, 2H).

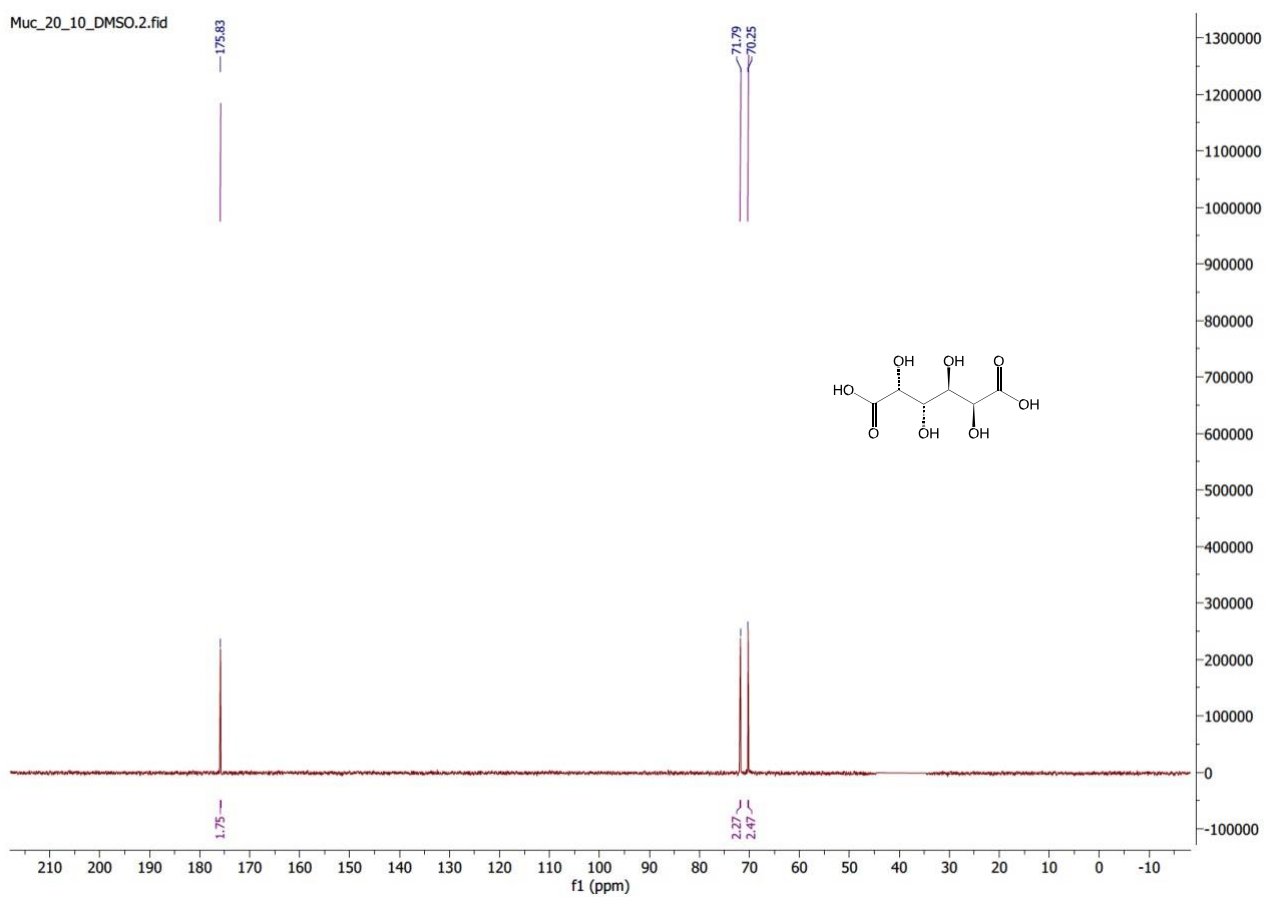

**Figure S12:**  $^{13}\text{C}$  NMR spectrum of isolated mucic acid from oxidation of lactose:  $^{13}\text{C}$  NMR (101 MHz, DMSO)  $\delta$  175.83, 71.79, 70.25.

## 1.2 High-Resolution Mass Spectrometry Analysis of Reaction Mixtures

Direct-infusion HRMS analyses with reaction mixtures after oxidation were performed on a 12-T Bruker solarix XR FT-ICR instrument, equipped with an Apollo-II electrospray ionization (ESI) source. The samples were diluted 1:1000 v/v with HPLC grade methanol and directly infused into the ion source by a syringe pump at a flow rate of 2  $\mu\text{L}/\text{min}$ . All the ESI FT-ICR MS data were acquired at an  $m/z$  range of 90-1000 with 200 co-added (4 MWord) time-domain transients. The instrument was externally calibrated with sodium trifluoroacetate (STFA) clusters and Bruker DataAnalysis 5.0 was used for the data post-processing and analysis. The molecular formulae for each ion were obtained by using a SmartFormula tool implemented in DataAnalysis.

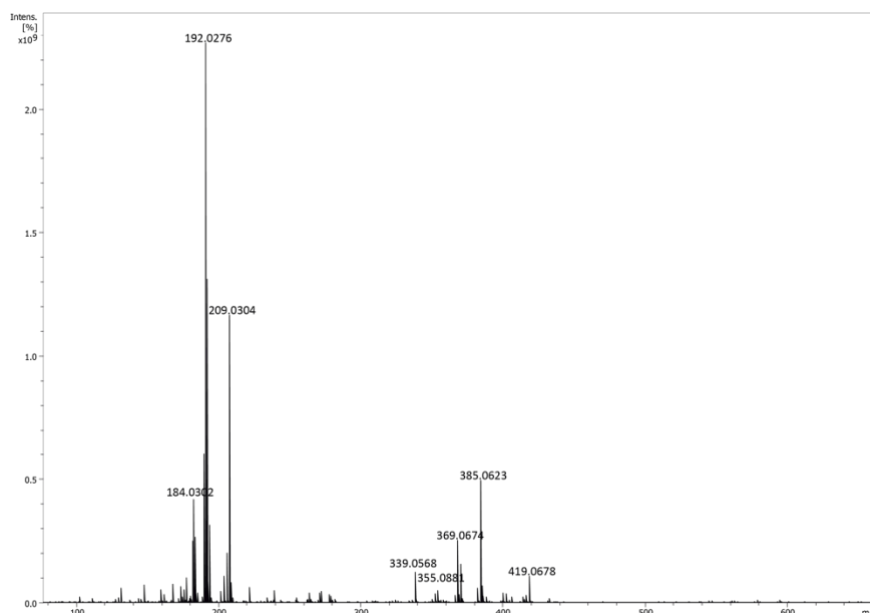

**Figure SI3:** Direct-infusion negative-ion ESI FT-ICR mass spectrum of the remaining compounds in the nitric acid oxidation mixture after the reaction and extraction of mucic acid.

**Table SI1:** Table of detected ions for nitric acid oxidation reaction mixture

| Singly charged ions |             |                                    |          |           |     |        |
|---------------------|-------------|------------------------------------|----------|-----------|-----|--------|
| Meas. m/z           | Ion Formula | Molecular formula (assignment)     | m/z      | err [ppm] | DBE | Charge |
| 193.0355            | C6H9O7      | C6H10O7 (glucuronic acid)          | 193.0354 | -0.5      | 2   | -1     |
| 195.0511            | C6H11O7     | C6H12O7 (gluconic/galactonic acid) | 195.051  | -0.5      | 1   | -1     |
| 209.0304            | C6H9O8      | C6H10O8 (glucaric acid)            | 209.0303 | -0.4      | 2   | -1     |
| 339.0568            | C11H15O12   | C11H16O12                          | 339.0569 | 0.2       | 4   | -1     |
| 369.0674            | C12H17O13   | C12H18O13                          | 369.0675 | 0.1       | 4   | -1     |
| 371.0831            | C12H19O13   | C12H20O13                          | 371.0831 | 0.1       | 3   | -1     |
| 385.0623            | C12H17O14   | C12H18O14                          | 385.0624 | 0.2       | 4   | -1     |
| Doubly charged ions |             |                                    |          |           |     |        |
| Meas. m/z           | Ion Formula | Molecular formula (assignment)     | m/z      | err [ppm] | DBE | Charge |
| 183.0224            | C12H14O13   | C12H16O13                          | 183.0223 | -0.6      | 5   | -2     |
| 184.0302            | C12H16O13   | C12H18O13                          | 184.0301 | -0.6      | 4   | -2     |
| 185.038             | C12H18O13   | C12H20O13                          | 185.0379 | -0.6      | 3   | -2     |
| 191.0198            | C12H14O14   | C12H16O14                          | 191.0197 | -0.5      | 5   | -2     |
| 192.0276            | C12H16O14   | C12H18O14                          | 192.0276 | -0.5      | 4   | -2     |
| 207.0147            | C12H14O16   | C12H16O16                          | 207.0146 | -0.4      | 5   | -2     |

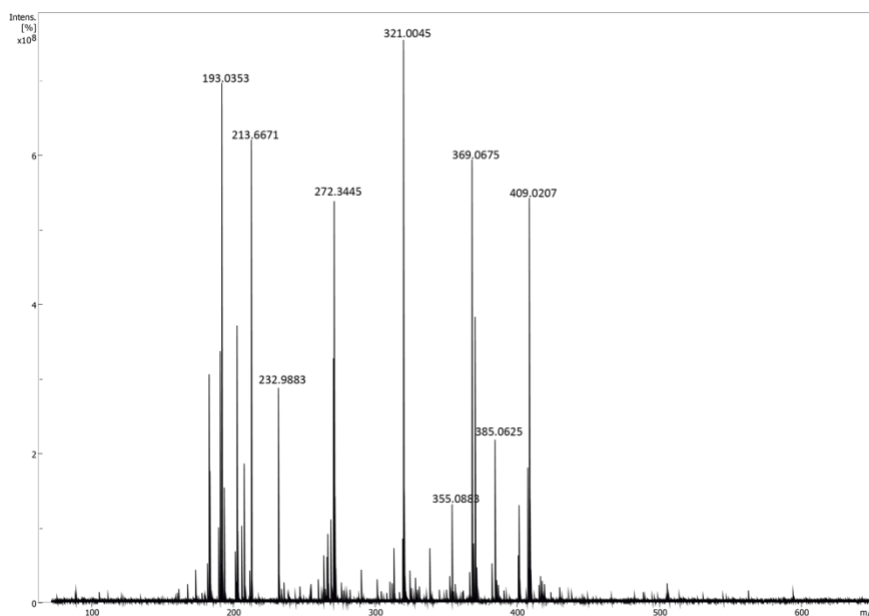

**Figure S14:** Direct-infusion negative-ion ESI FT-ICR mass spectrum of the remaining compounds in the nitric acid oxidation mixture with 5mol% added TEMPO after reaction after the reaction and extraction of mucic acid.

**Table S12:** Table of detected ions for nitric acid oxidation reaction mixture with 5mol% TEMPO added

| Singly charged ions |             |                                    |          |           |     |        |
|---------------------|-------------|------------------------------------|----------|-----------|-----|--------|
| Meas. m/z           | Ion Formula | Molecular formula (assignment)     | m/z      | err [ppm] | DBE | Charge |
| 191.0196            | C6H7O7      | C6H8O7                             | 191.0197 | 0.6       | 3   | -1     |
| 193.0353            | C6H9O7      | C6H10O7 (glucuronic acid)          | 193.0354 | 0.5       | 2   | -1     |
| 195.0509            | C6H11O7     | C6H12O7 (gluconic/galactonic acid) | 195.051  | 0.5       | 1   | -1     |
| 209.0302            | C6H9O8      | C6H10O8 (glucaric acid)            | 209.0303 | 0.4       | 2   | -1     |
| 355.0883            | C12H19O12   | C12H20O12                          | 355.0882 | -0.1      | 3   | -1     |
| 369.0675            | C12H17O13   | C12H18O13                          | 369.0675 | -0.2      | 4   | -1     |
| 371.0832            | C12H19O13   | C12H21O13                          | 371.0831 | -0.2      | 3   | -1     |
| 385.0625            | C12H17O14   | C12H18O14                          | 385.0624 | -0.3      | 4   | -1     |

  

| Doubly charged ions |             |                   |          |           |     |        |
|---------------------|-------------|-------------------|----------|-----------|-----|--------|
| Meas. m/z           | Ion Formula | Molecular formula | m/z      | err [ppm] | DBE | Charge |
| 184.03              | C12H16O13   | C12H18O13         | 184.0301 | 0.7       | 4   | -2     |
| 185.0378            | C12H18O13   | C12H20O13         | 185.0379 | 0.7       | 3   | -2     |
| 191.0196            | C12H14O14   | C12H16O14         | 191.0197 | 0.6       | 5   | -2     |
| 192.0274            | C12H16O14   | C12H18O14         | 192.0276 | 0.6       | 4   | -2     |
| 207.0146            | C12H14O16   | C12H16O16         | 207.0146 | 0.4       | 5   | -2     |

## 2.0 Esterification of mucic acid. Procedure and spectra

In a round bottom flask with stirring bar 10g of Mucic acid was added with p-Toluenesulfonic acid (21mol%) and 100mL of respective alcohol for the desired ester. The mixture was then refluxed for 24 hours. The resulting solution was then filtered under vacuo, washed with DI water before drying over night. The white crystals were weighed and analysed by  $^1\text{H}$  &  $^{13}\text{C}$ NMR.

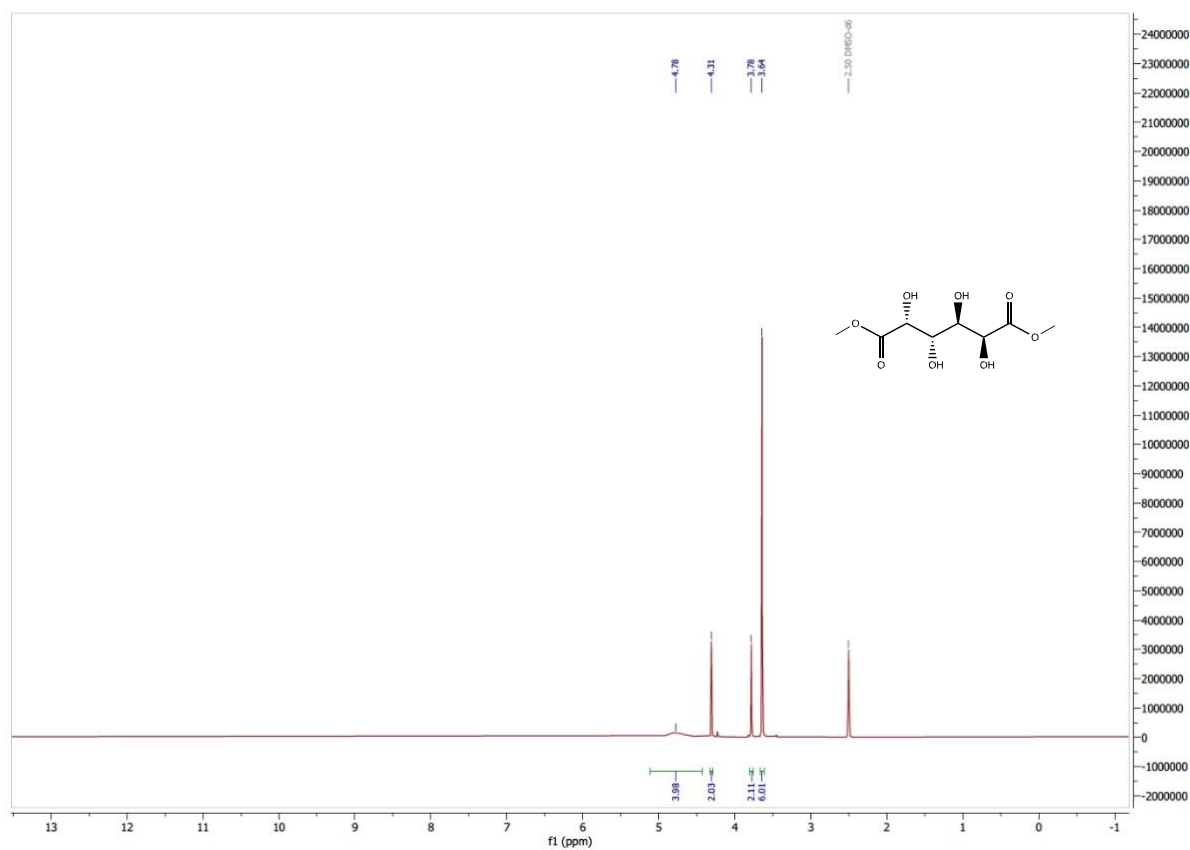

**Figure S15:**  $^1\text{H}$  NMR spectrum of mucic acid from oxidation of dimethyl mucate ester  $\delta$  H (400 MHz, DMSO) 4.78 (4 H, br s), 4.31 (2 H, s), 3.78 (2 H, s), 3.64 (6 H, s).

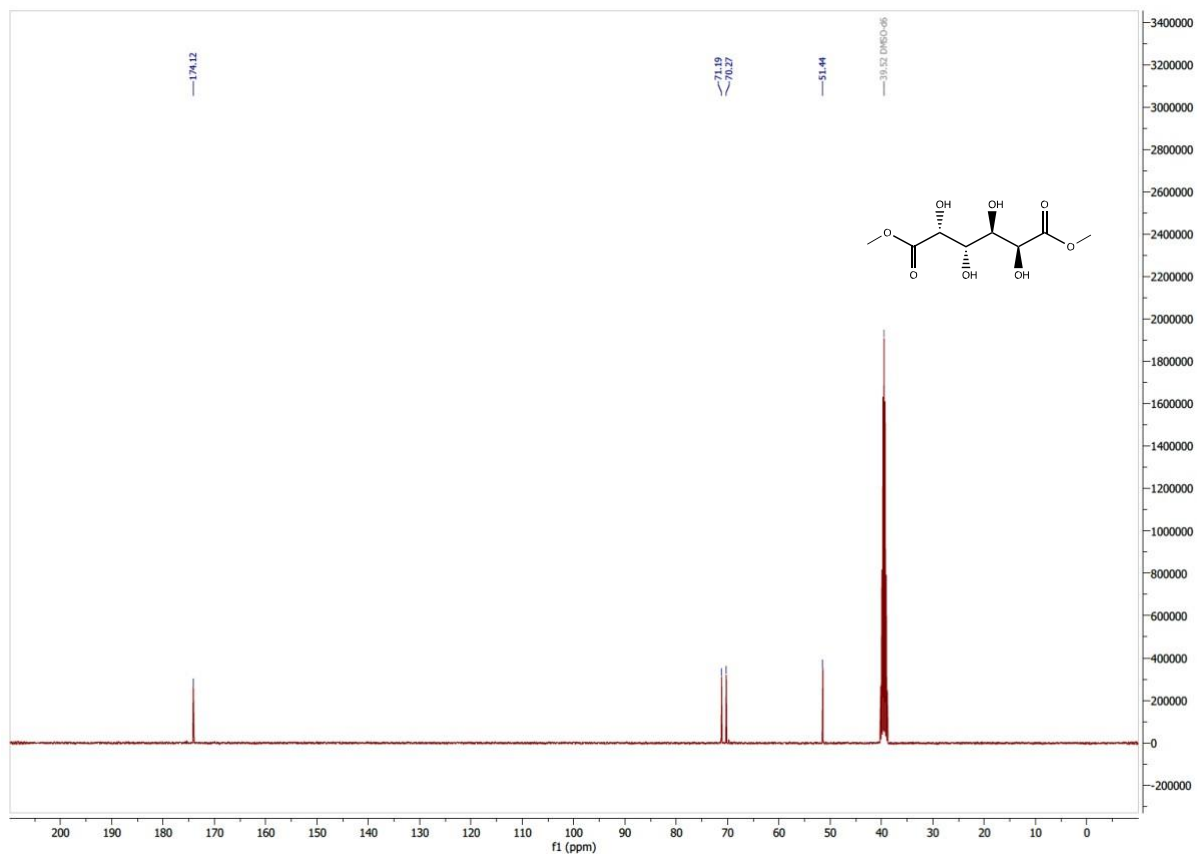

**Figure S16:** <sup>13</sup>C NMR spectrum of isolated mucic acid from oxidation of dimethyl mucate ester:  $\delta$  C (101 MHz, DMSO) 174.1, 71.2, 70.3, 51.4.





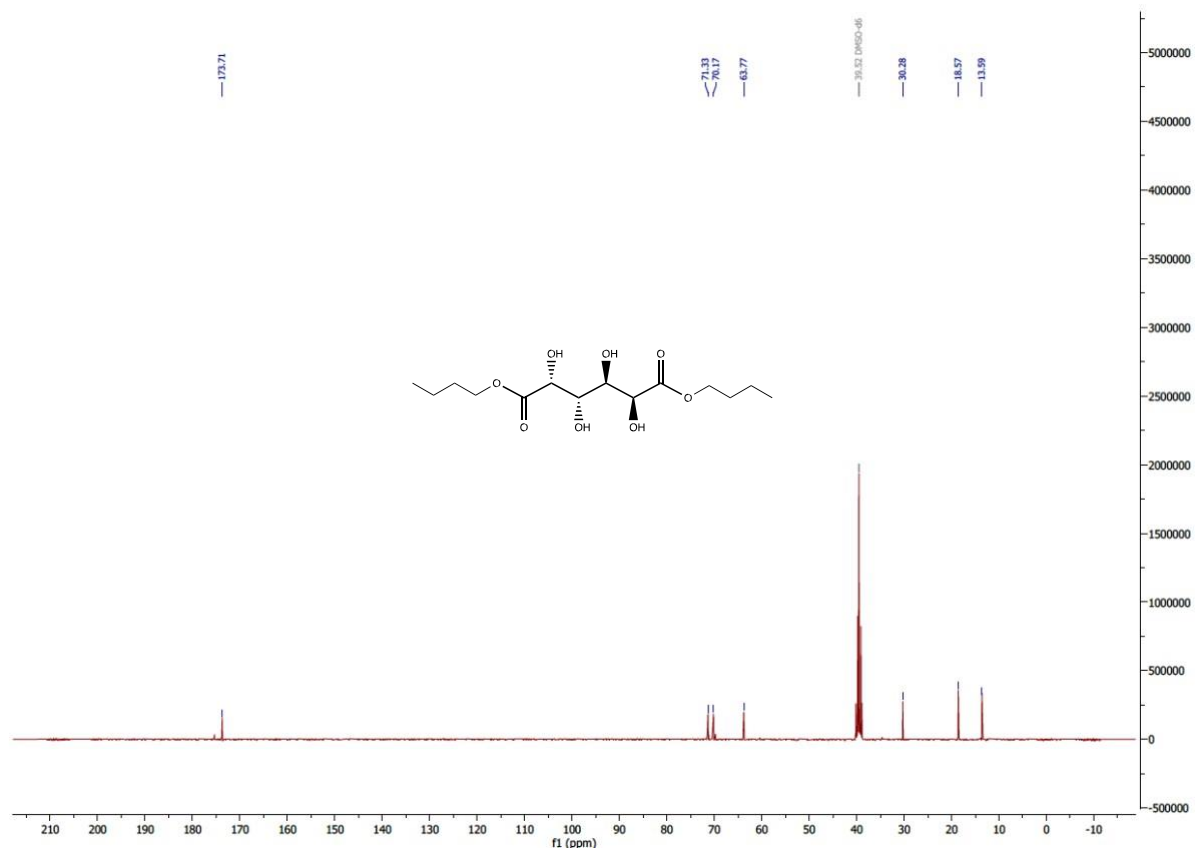

**Figure S18:** <sup>13</sup>C NMR spectrum of isolated mucic acid from oxidation of dibutyl mucate ester:  $\delta$  C (101 MHz, DMSO) 173.7, 71.3, 70.2, 63.8, 30.3, 18.6, 13.6.

### 3.0 Dehydration of Mucate Esters

#### 3.1 Dehydration of mucate esters to furan carboxylates general procedure

Inside an autoclave reactor 20mL vessel 0.3-0.4mmol of diesterified mucate ester, along with 15 mL respective alcohol (methanol for methyl esters and 1-butanol for butyl esters) and the selected acid catalyst are added. The vessel is then purged three times with N<sub>2</sub> before charging to the desired reaction pressure. A programmed reaction run is then initiated ramping to the desired temperature at 2.5°C/min before holding for desired reaction time. Once completed the reactor is water cooled to room temperature before returning to atmospheric pressure. The obtained solution is then centrifuged to separate and recover the catalyst, followed by sample preparation for GC-MS and GC-FID analysis to quantify the reaction products.

#### 3.2 GC Analysis

The furan carboxylate esters were quantified using gas chromatography for peak definition and accuracy of quantification. For this an Agilent 6890N equipped with an autosampler and 5973N MSD detector and an Agilent 7890B GC equipped with flame ionisation detector was used for high quality detection and quantification. The column used in both instruments was an Agilent J&W GC HP Column, length 30m, diameter 0.25mm and 0.25µm film. An internal standard of 2,3,5-trichloro benzene was used and quantifications made using external quantification with respect to the internal standard for high precision quantifications.

#### 3.3 Zeolite dehydration experiments

**Table S13:** Recorded yields from zeolite screening experiments. Reaction conditions: 0.4mmol dimethyl mucate, 50wt% zeolite, 15mL methanol, 10bar N<sub>2</sub> in a sealed reaction vessel.

| Zeolite | Si:Al | Temperature / °C | Time / Hr | Yield 2,5MFDC 2b / mol% | Yield 2-MFC 3b/ mol% |
|---------|-------|------------------|-----------|-------------------------|----------------------|
| Beta    | 30    | 220              | 1         | 12.2                    | 13.2                 |
| Beta    | 30    | 220              | 3         | 30.1                    | 25.0                 |
| Beta    | 30    | 220              | 10        | 1.5                     | 2.6                  |
| Beta    | 360   | 220              | 3         | 17.4                    | 18.8                 |

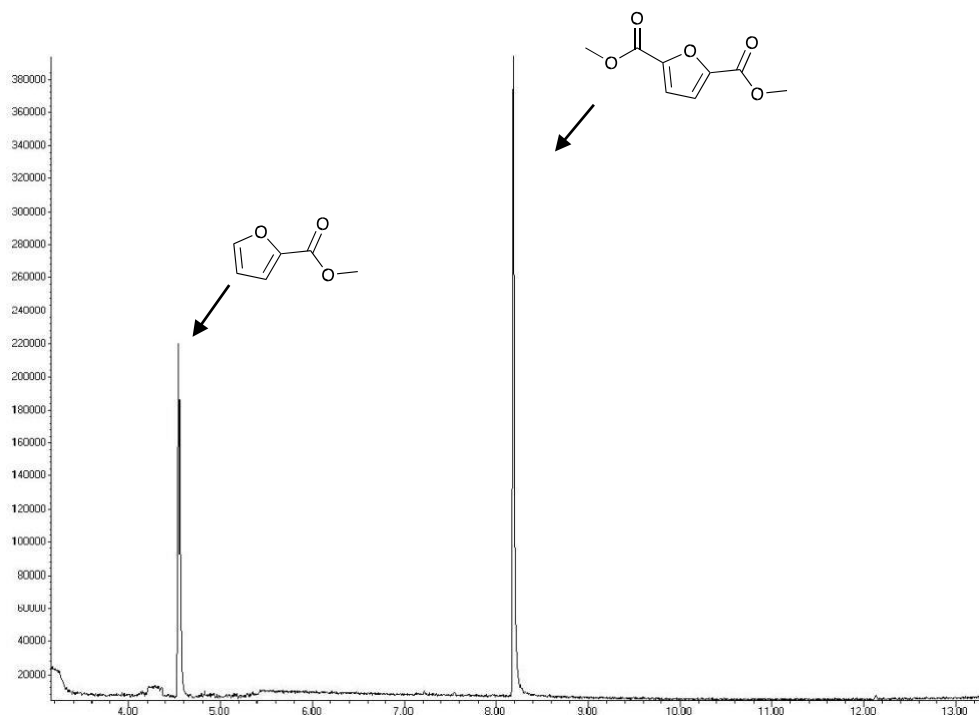

**Figure S19:** Example GC spectra obtained on GC-MS Spectrometer for the reaction products **2b** and **3b** in ethyl acetate

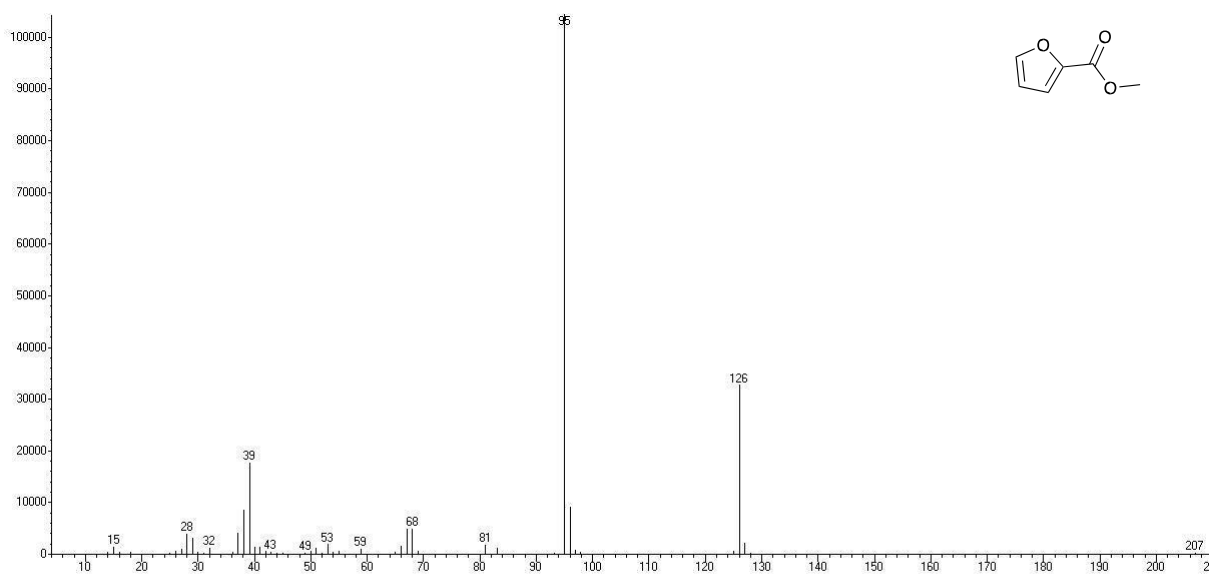

**Figure S110:** Example MS spectra obtained on GC-MS Spectrometer for the reaction product **3b** using EI as ion source

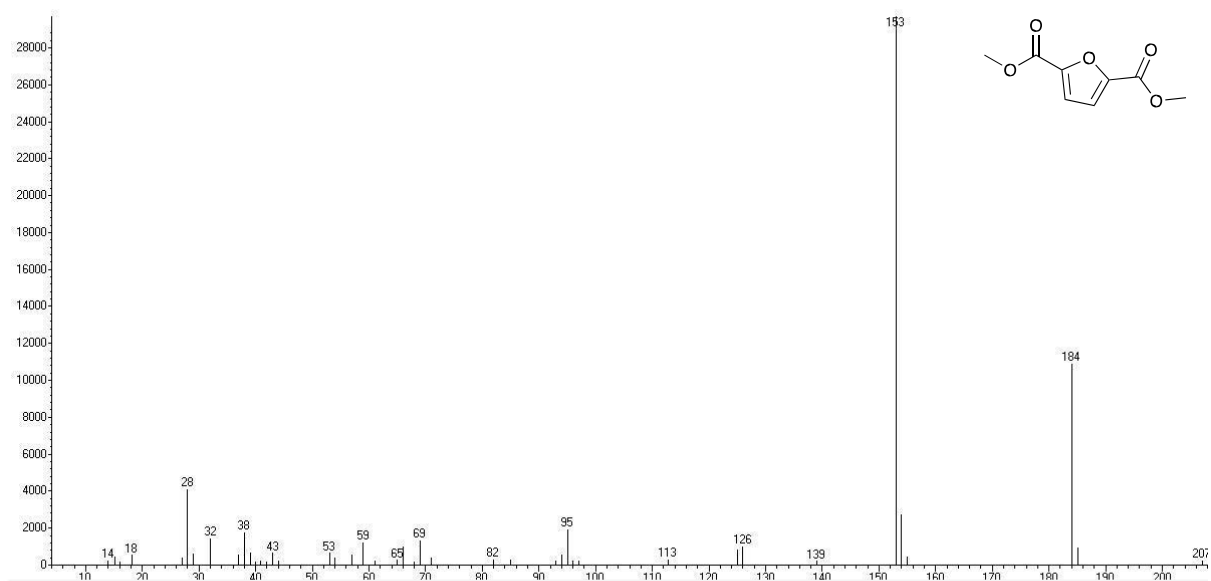

**Figure S111:** Example MS spectra obtained on GC-MS Spectrometer for the reaction product **2b** using EI as ion source.

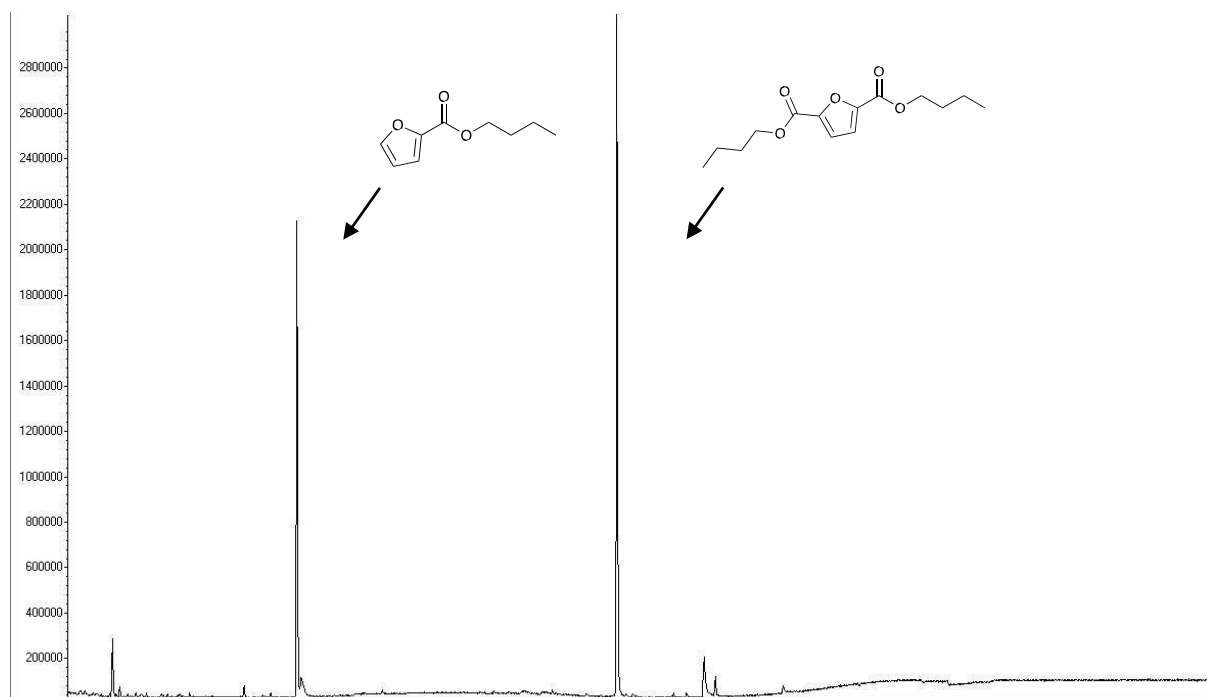

**Figure S112:** Example GC spectra obtained on GC-MS Spectrometer for the reaction products **2c** and **3c** in ethyl acetate

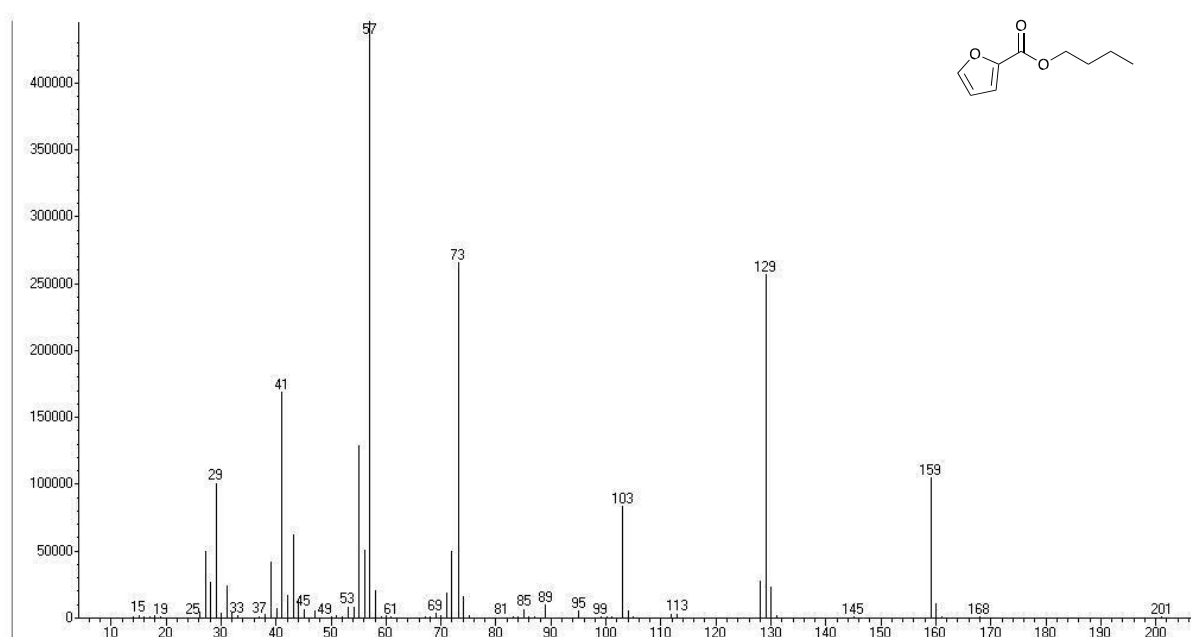

**Figure S113:** Example MS spectra obtained on GC-MS Spectrometer for the reaction product **3c** using EI as ion source.

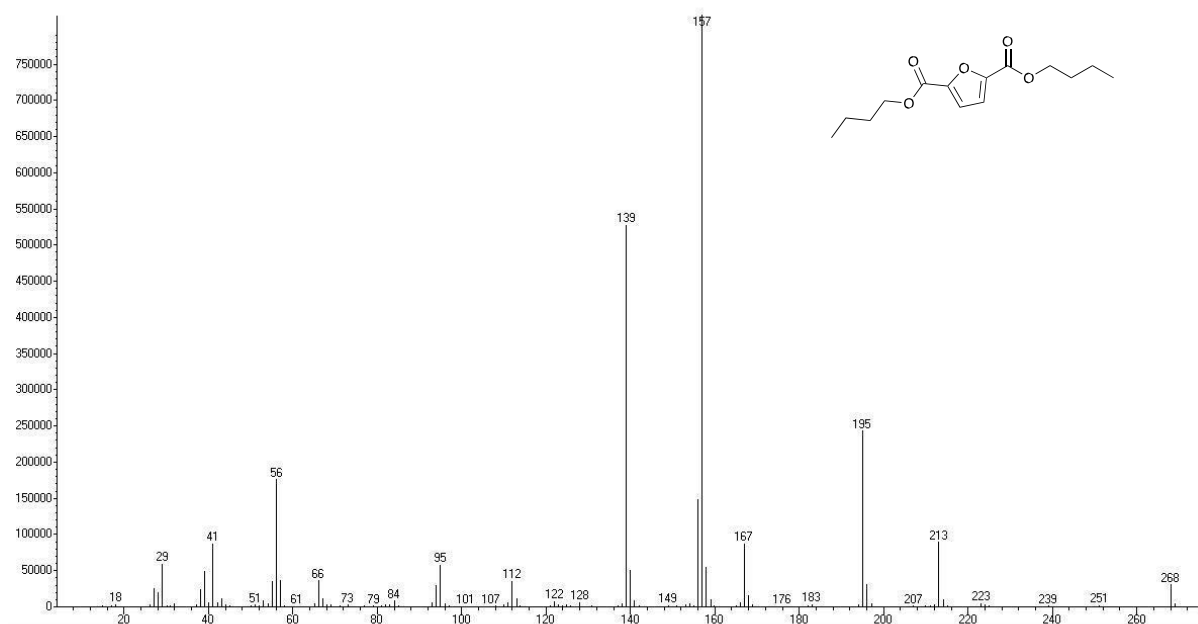

**Figure SI14:** Example MS spectra obtained on GC-MS Spectrometer for the reaction product **2c** using EI as ion source.

Compound **2c**, dibutyl furandicarboxylate was isolated via column chromatography using silica gel (40–63  $\mu\text{m}$ ; VWR Chemicals) as stationary and DCM as mobile phase.

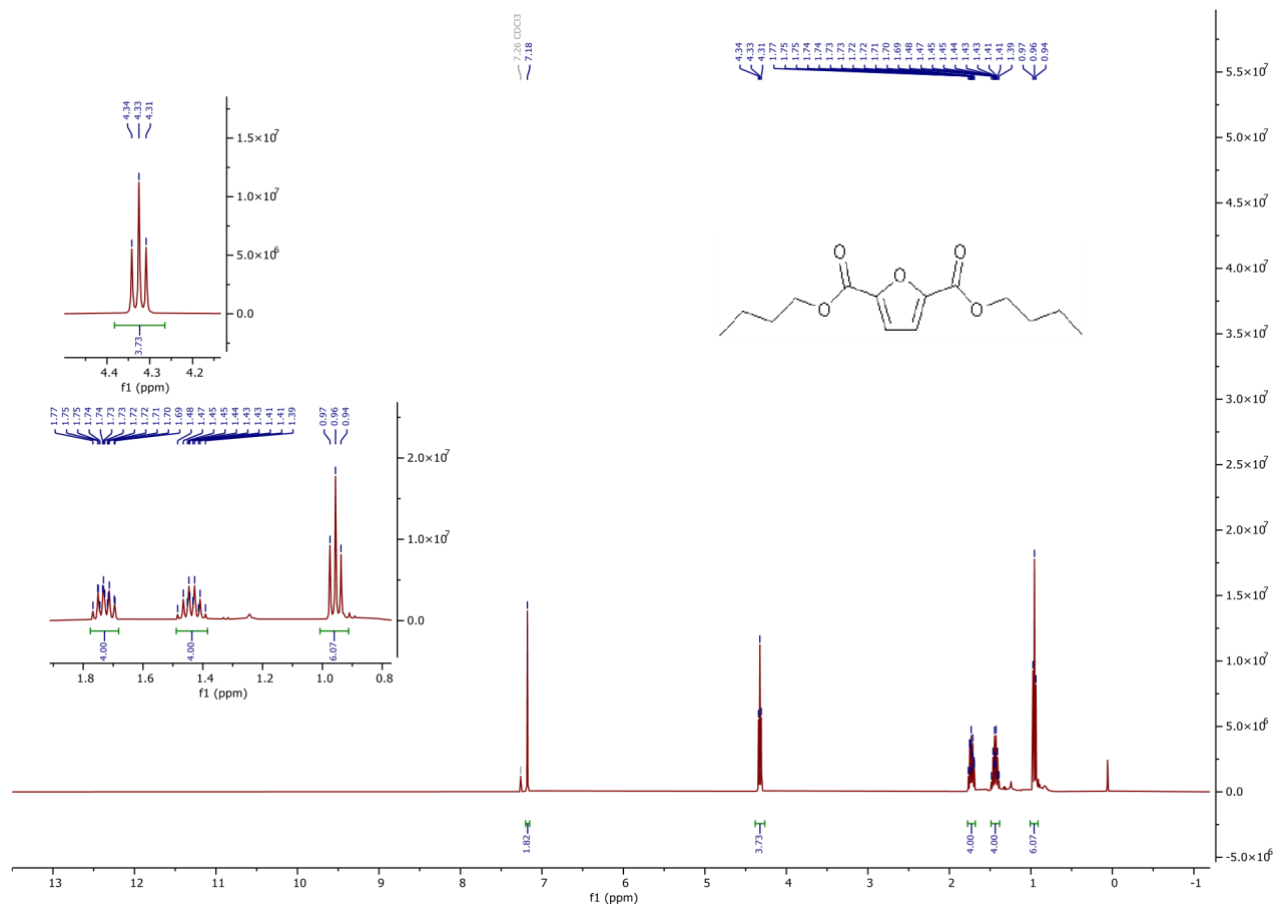

**Figure S115:**  $^1\text{H}$  NMR spectrum of isolated compound **2c**:  $\delta$   $^1\text{H}$  (400 MHz,  $\text{CDCl}_3$ ): 7.18 (2 H, s), 4.33 (4 H, t, J 6.7), 1.78–1.68 (4 H, m), 1.49–1.38 (4 H, m), 0.96 (6 H, t, J 7.4).



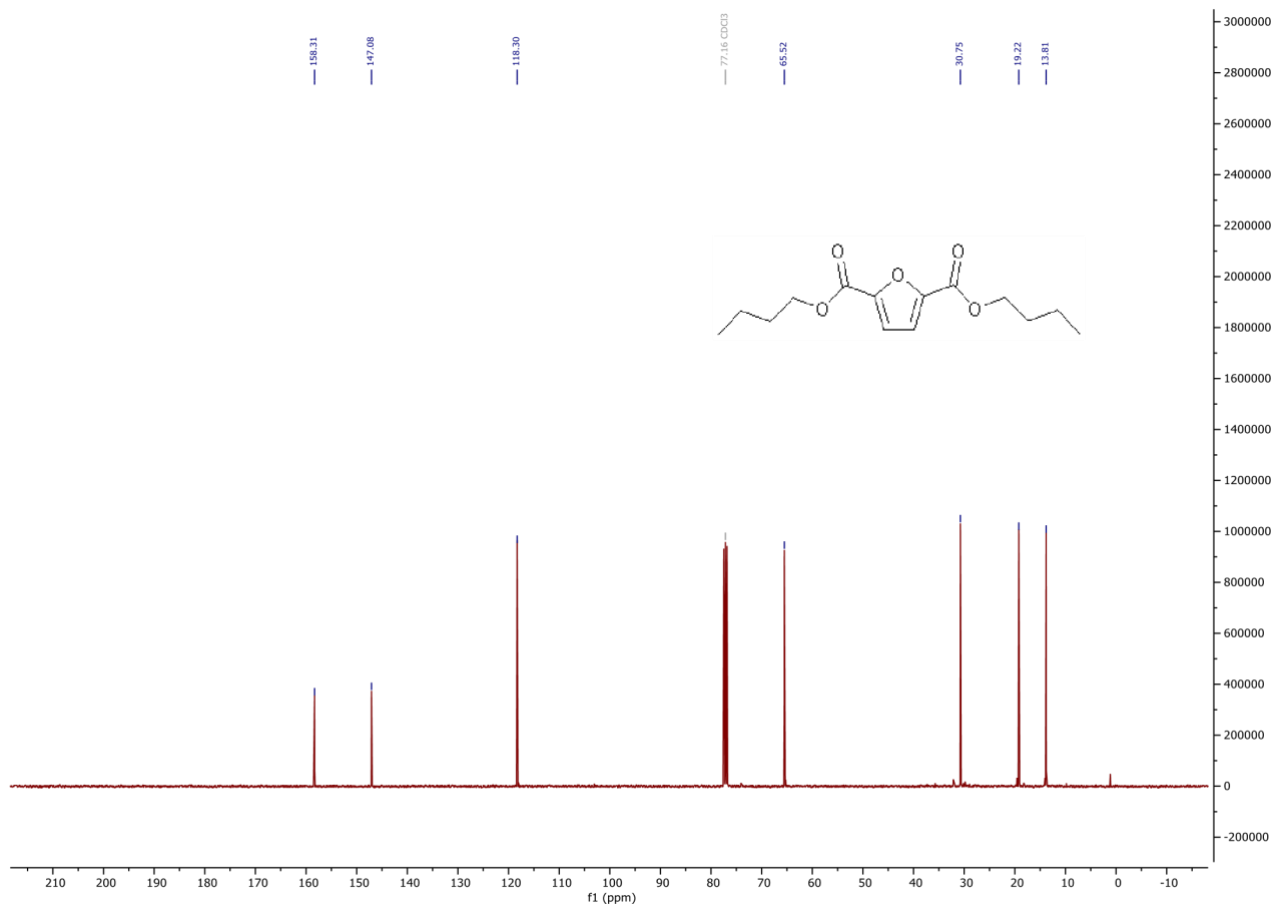

**Figure S116:** <sup>13</sup>C NMR spectrum of isolated compound **2c**:  $\delta^{13}\text{C}$  (101 MHz, CDCl<sub>3</sub>): 158.3, 17.1, 118.3, 65.5, 30.7, 19.2, 13.8.

### 3.4 Design of Experiments Methods for Dehydration of Dibutyl Mucate Ester to dibutyl furandicarboxylate

#### D-Optimal Design for Optimised Results

As the dependence on time, temperature and catalyst loading was large for the dehydration reaction but the scope for the acceptable parameters were narrow, a D-Optimal (figure SI15) design was selected to precisely obtain the optimal conditions. All statistical models were generated using Umetrics Sartorius Modde Pro software and the contour plots presented in figure 3 were generated by the software.

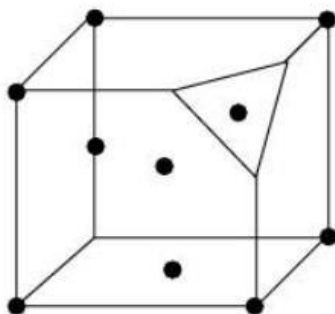

Figure SI 17: D-optimal statistical design of the experimental region

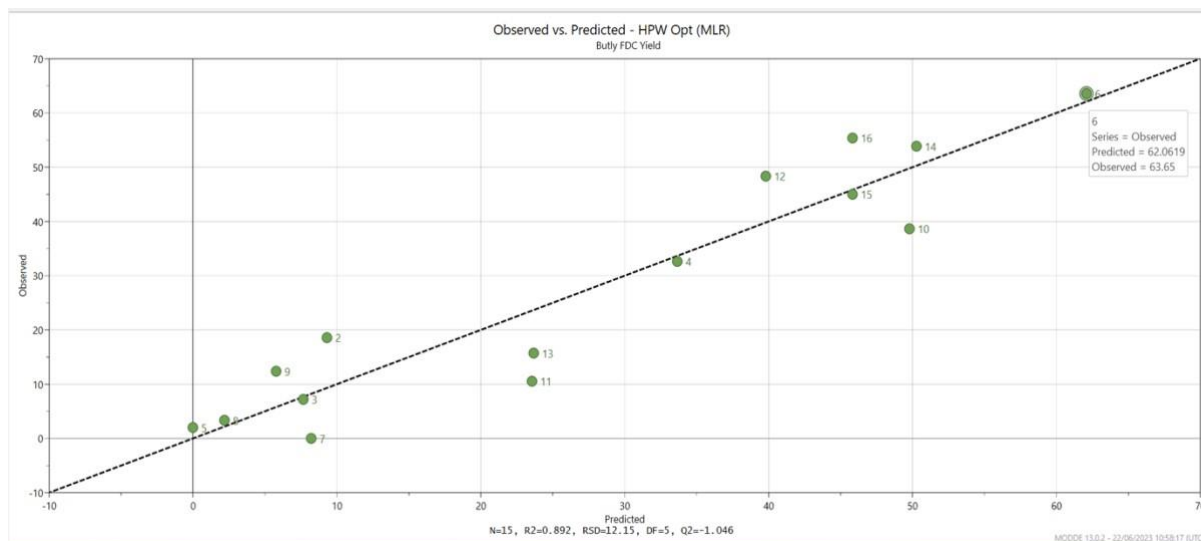

Figure SI18: Observed vs Predicted plot of the response for the yield of **2c** as a function of reaction time, temperature and catalytic loading.

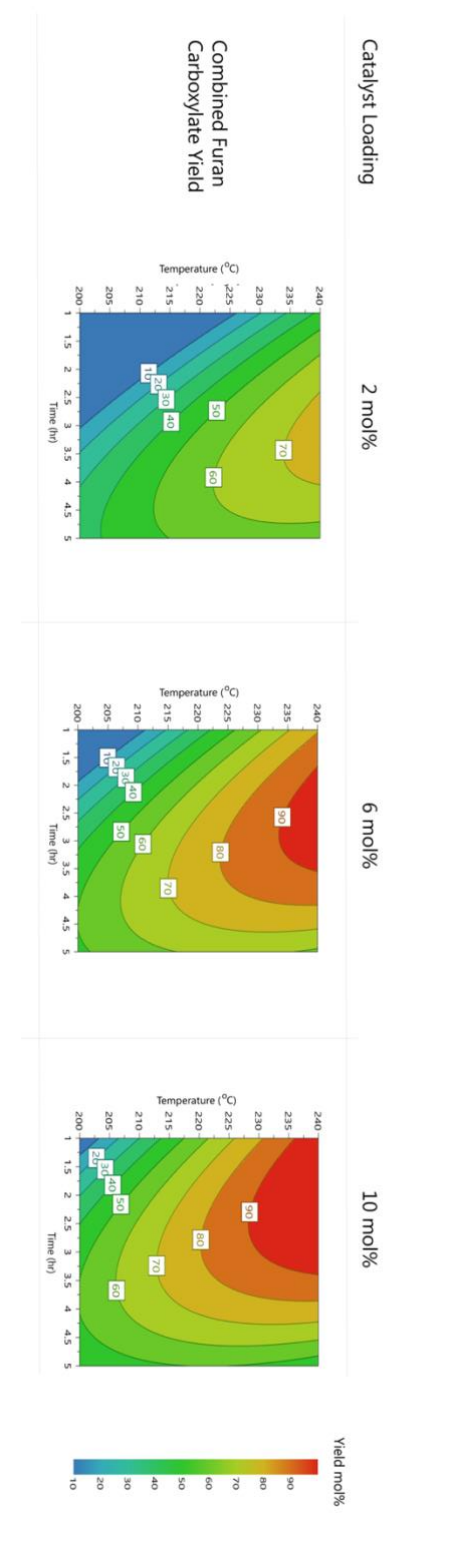

**Figure S119:** D-optimal of The effect of temperature (200-240°C), reaction time (1-5hr) and catalyst loading (2-10mol%) on the yield of Dibutyl-2,5-Furandicarboxylate modelled with D-Optimal Design of Experiment model.
